# Supplementary material for: Combination therapy with vemurafenib (PLX4032/RG7204) and metformin in melanoma cell lines with distinct driver mutations
Source: Springer Nature journal article supplement (doi:10.1186/1479-5876-9-76), 2011-05-24

p-ERK Thr202/204

ERK

p-LKB1 Ser428

p-AMPK Thr172

AMPK

Synergy

DMSO  
PLX4032  
Metformin  
CombinationDMSO  
PLX4032  
Metformin  
CombinationDMSO  
PLX4032  
Metformin  
Combination

++ M249

- M249AR4

+ M263

-- M308

- SKMEL28

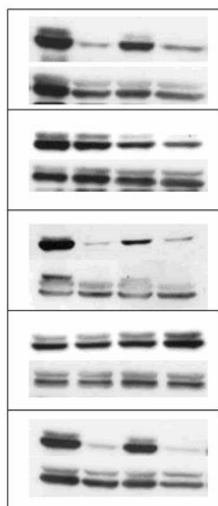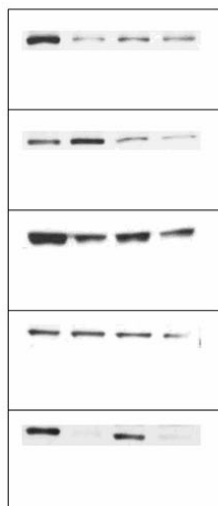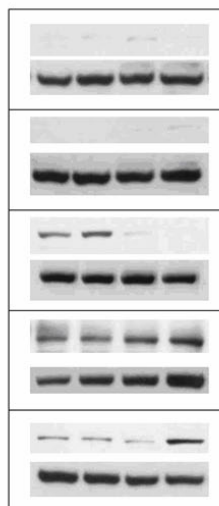

p-ACC Ser79

ACC

p-S6K Thr389

p-S6 Ser235/236

S6

Synergy

DMSO  
PLX4032  
Metformin  
CombinationDMSO  
PLX4032  
Metformin  
CombinationDMSO  
PLX4032  
Metformin  
Combination

++ M249

- M249AR4

+ M263

-- M308

- SKMEL28

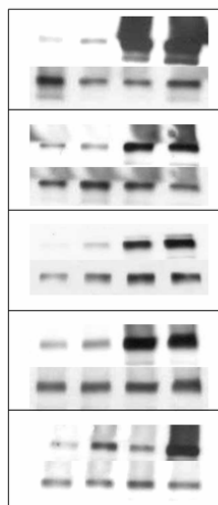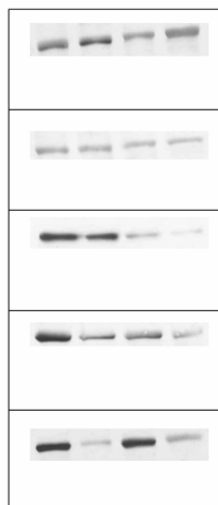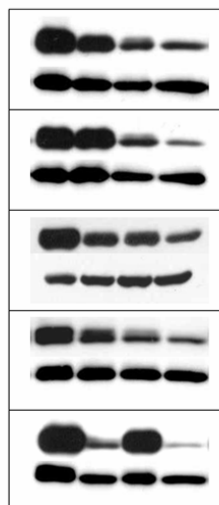

Supplement: 12967_2011_737_MOESM8_ESM.pdf [file 12967_2011_737_MOESM8_ESM.pdf]
