# Supplementary material for: Combination therapy with vemurafenib (PLX4032/RG7204) and metformin in melanoma cell lines with distinct driver mutations
Source: Springer Nature journal article supplement (doi:10.1186/1479-5876-9-76), 2011-05-24
Supplement: 12967_2011_737_MOESM9_ESM.pdf [file 12967_2011_737_MOESM9_ESM.pdf]

p-ERK Thr202/204

ERK

DMSO  
PLX4032  
Metformin  
Combination

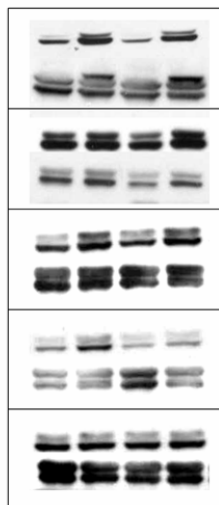

p-LKB1 Ser428

DMSO  
PLX4032  
Metformin  
Combination

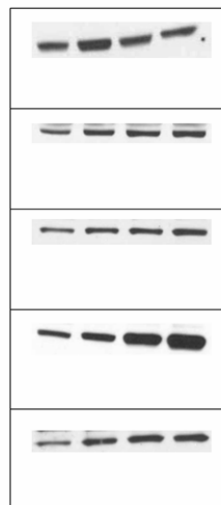

p-AMPK Thr172

AMPK

DMSO  
PLX4032  
Metformin  
Combination

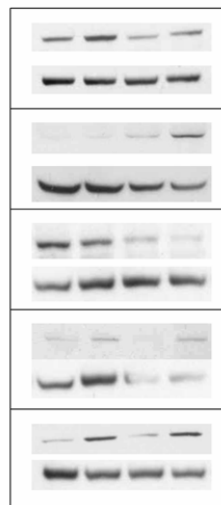

Synergy

+ M207

+ M296

-- SKMEL173

+ WM1366

+ M257

p-ACC Ser79  
ACC

DMSO  
PLX4032  
Metformin  
Combination

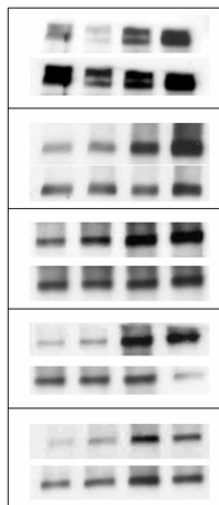

p-S6K Thr389

DMSO  
PLX4032  
Metformin  
Combination

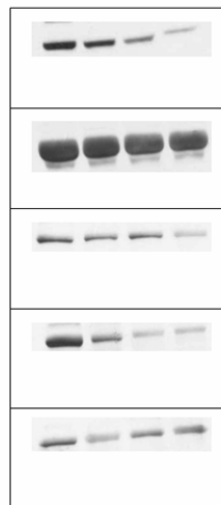

p-S6 Ser235/236  
S6

DMSO  
PLX4032  
Metformin  
Combination

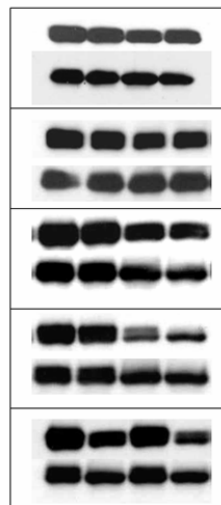

Synergy

+ M207

+ M296

-- SKMEL 173

+ WM1366

+ M257
