# Supplementary figures and images for: Combination therapy with vemurafenib (PLX4032/RG7204) and metformin in melanoma cell lines with distinct driver mutations
Source: Springer Nature journal article supplement (doi:10.1186/1479-5876-9-76), 2011-05-24

**M263****M308****a)**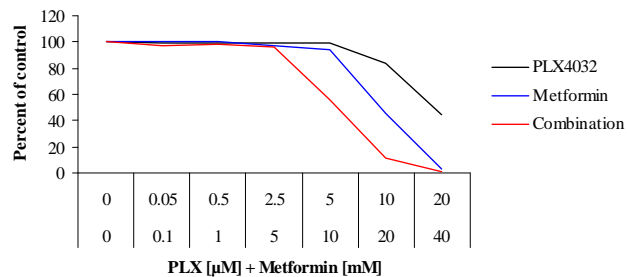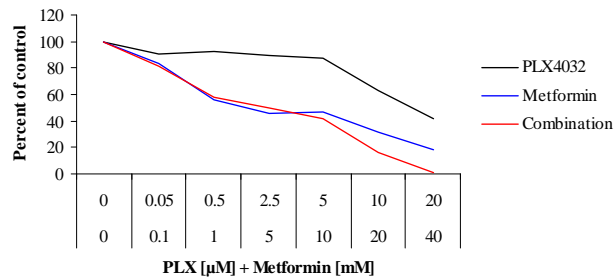**M207****SKMEL173**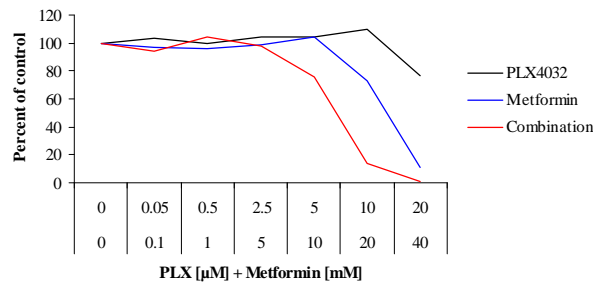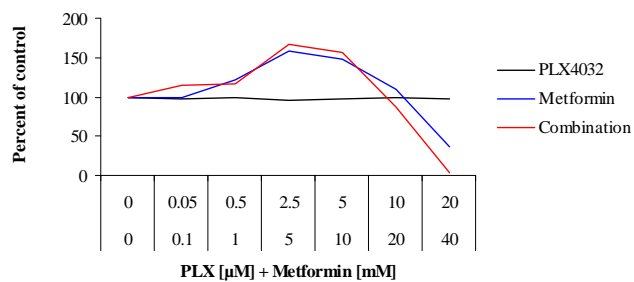**b)**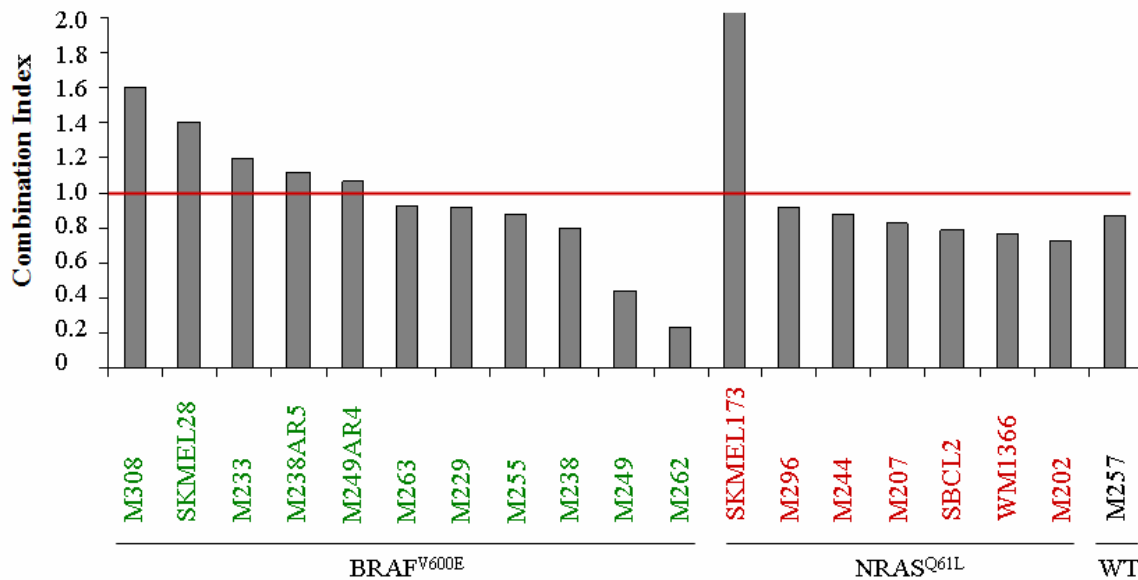

Supplement: 12967_2011_737_MOESM5_ESM.pdf [file 12967_2011_737_MOESM5_ESM.pdf]

a)

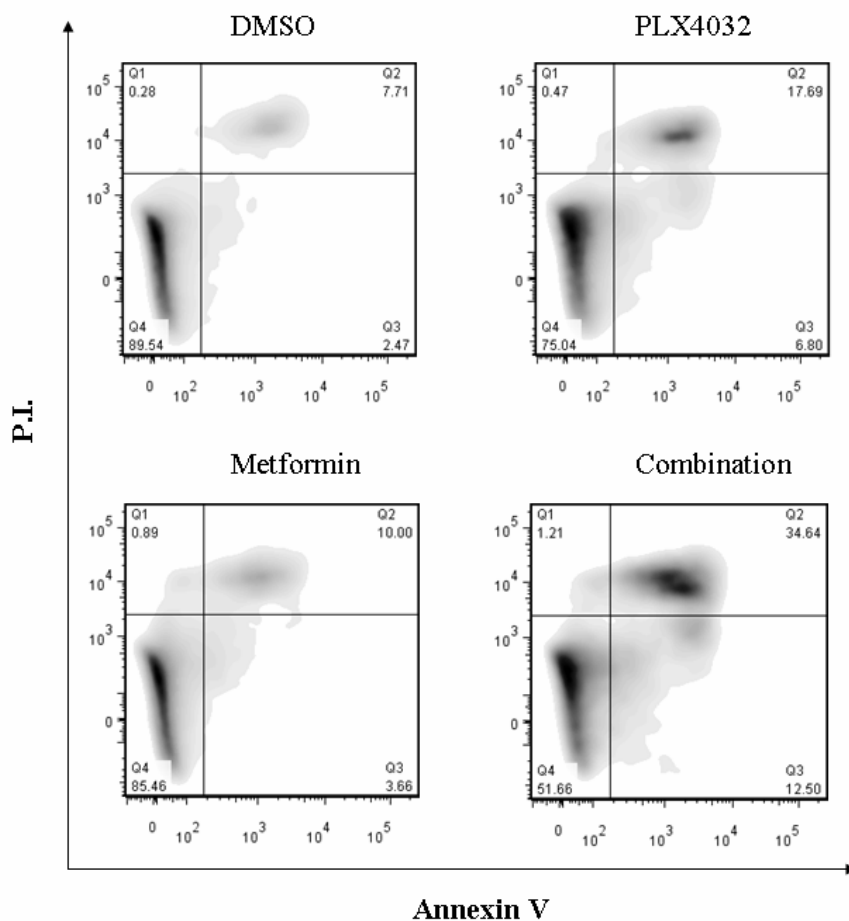

b)

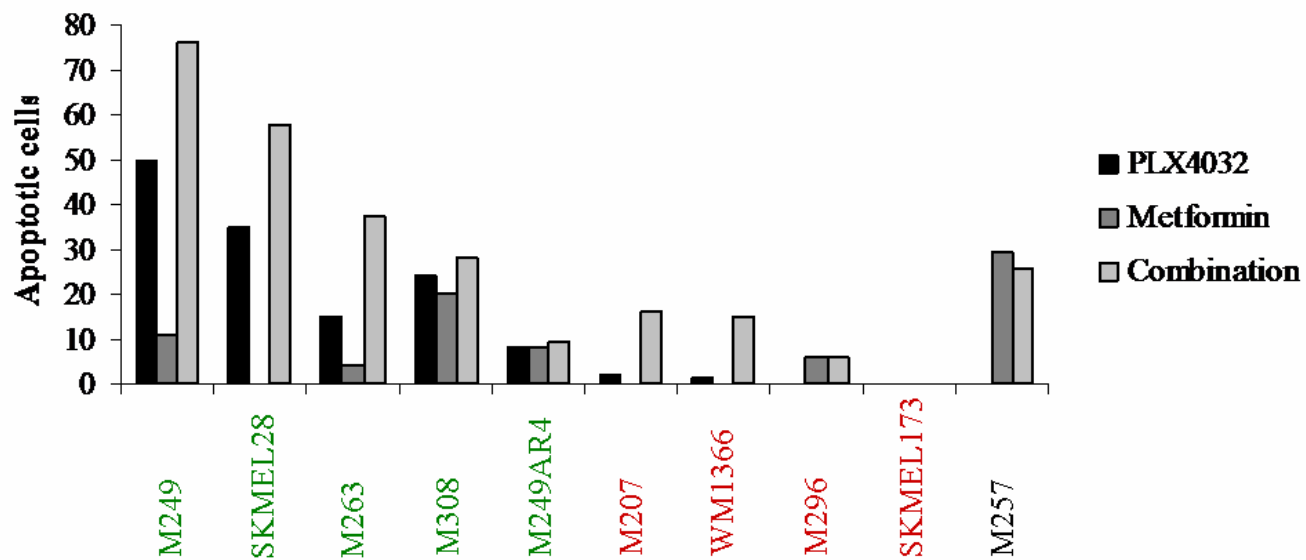

Supplement: 12967_2011_737_MOESM7_ESM.pdf [file 12967_2011_737_MOESM7_ESM.pdf]
